# Supplementary material for: SciBet as a portable and fast single cell type identifier
Source: PubMed Central journal article supplement (PMC7156687; doi:10.1038/s41467-020-15523-2), 2020-04-14
Supplement: 41467_2020_15523_MOESM1_ESM.pdf [file 41467_2020_15523_MOESM1_ESM.pdf]

# SUPPLEMENTARY INFORMATION

## SciBet a portable and fast single cell type identifier

Li et al.

|                          |       |       |
|--------------------------|-------|-------|
| Supplementary Figures    | ----- | 2-6   |
| Supplementary Tables     | ----- | 7-13  |
| Supplementary Notes      | ----- | 14-18 |
| Supplementary References | ----- | 19-22 |

# SUPPLEMENTARY FIGURES

Supplementary Figure 1: Benchmark result of feature selection  
methods for each dataset ----- 3

Supplementary Figure 2: Benchmark of classifiers for each dataset  
measured by accuracy score ----- 4

Supplementary Figure 3: Benchmark of classifiers for each dataset  
measured by balanced accuracy score -----5

Supplementary Figure 4: Benchmark of classifiers for each FPR  
control pair ----- 6

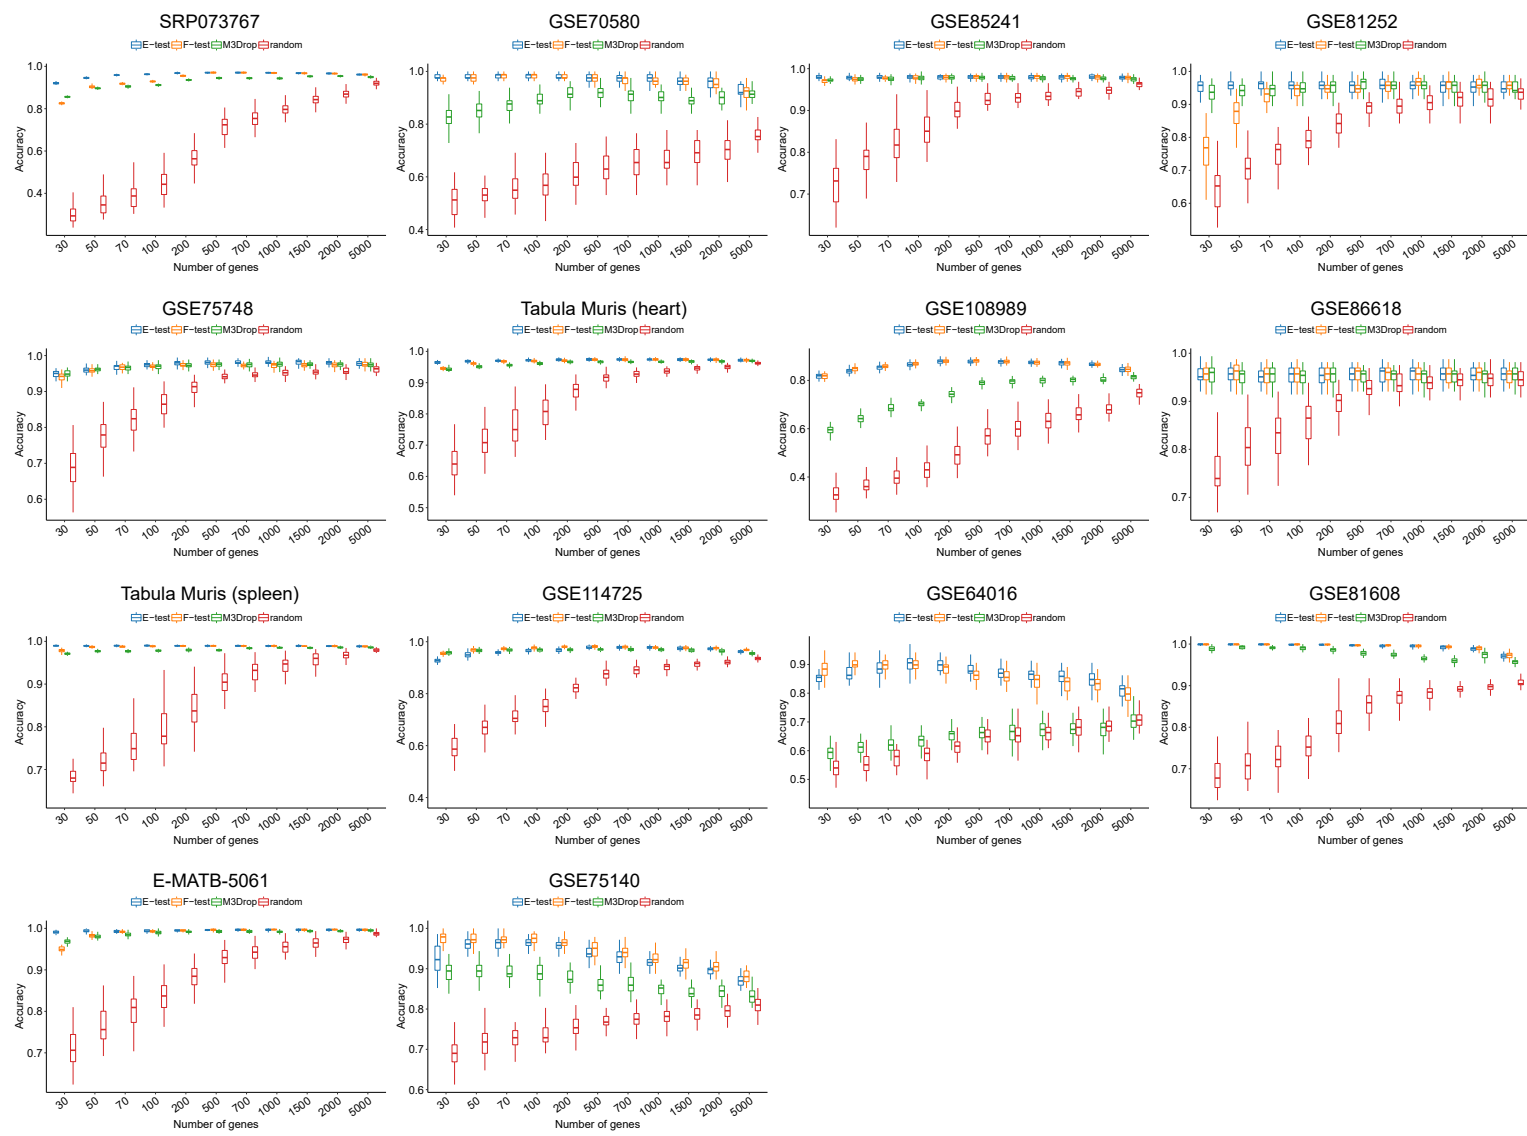

**Supplementary Figure 1.** Benchmark result of feature selection methods for each of the 14 datasets. For each sub-plot, use scmap on 50 train-test instances ( $n=50$ ) with different gene numbers, and measure the performance by the accuracy score. Box plot shows the center line for the median, hinges for the interquartile range and whiskers for 1.5 times the interquartile range.

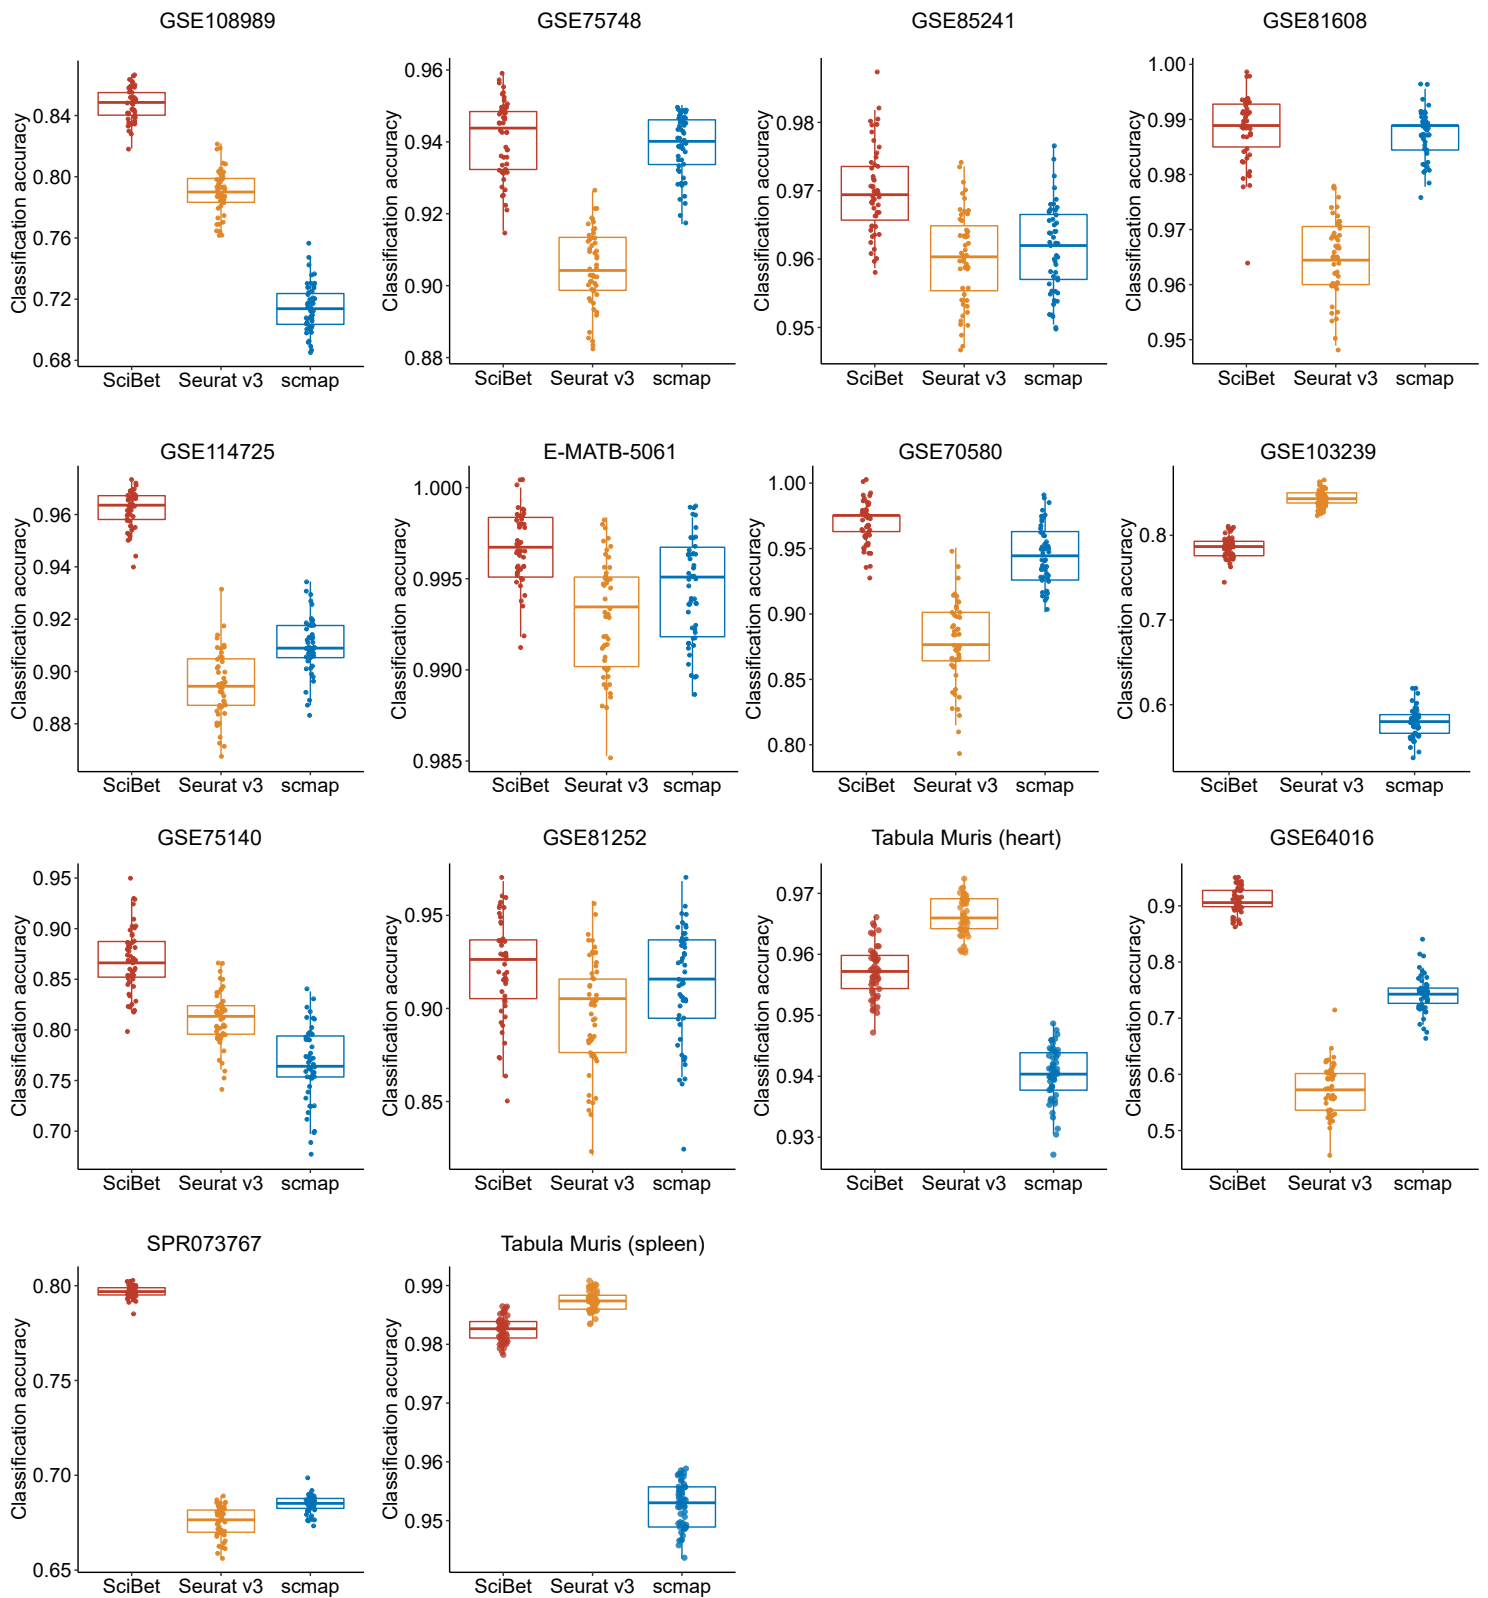

**Supplementary Figure 2.** Benchmark result of classifiers for each of the 14 datasets. For each sub-plot, benchmark different classifiers on 50 train-test instances ( $n=50$ ) with 500 genes selected by E-test, and measure the performance by the accuracy score. Box plot shows the center line for the median, hinges for the interquartile range and whiskers for 1.5 times the interquartile range.

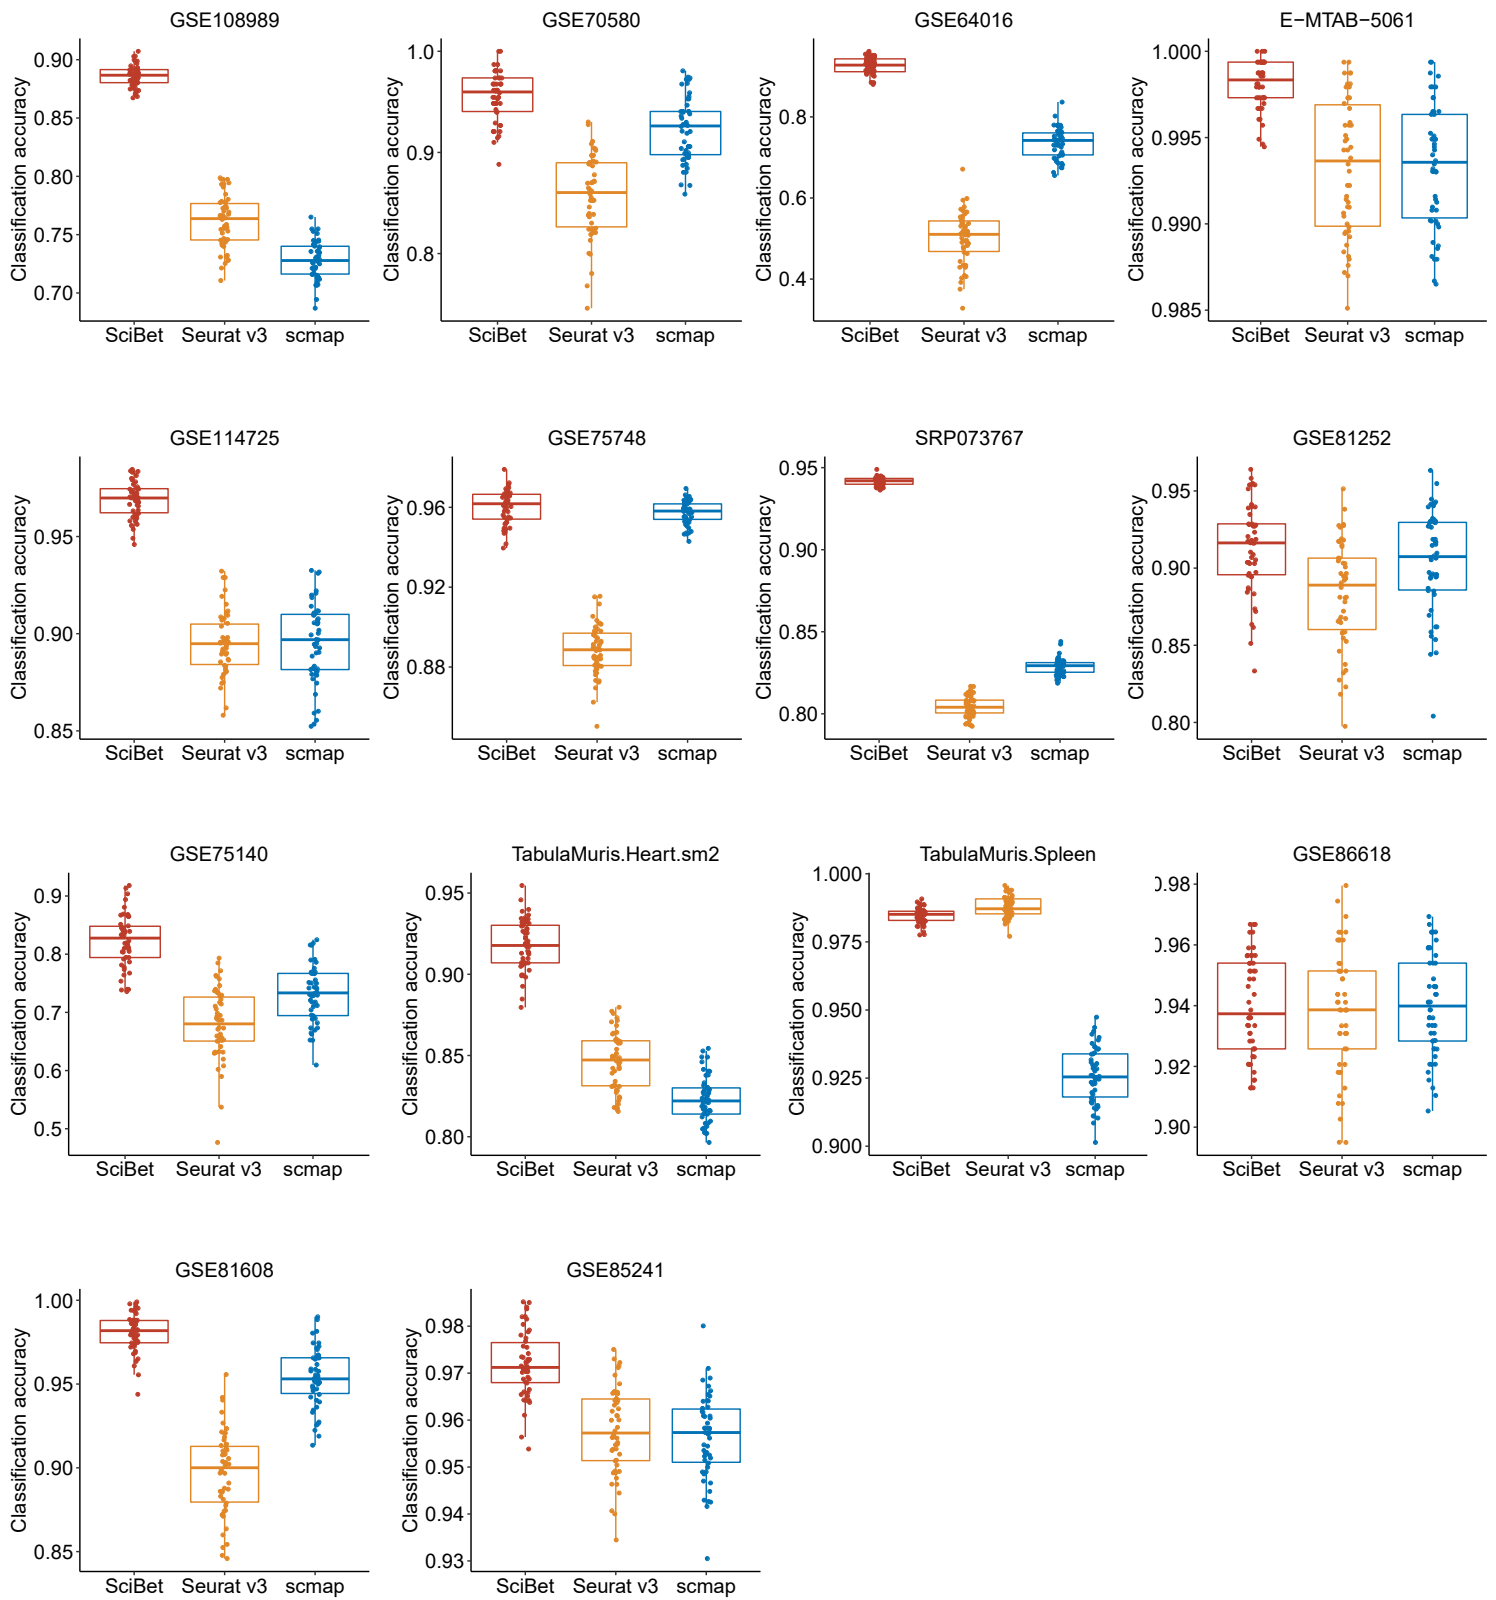

**Supplementary Figure 3.** Benchmark result of classifiers for each of the 14 datasets measured by balanced accuracy score. For each sub-plot, benchmark different classifiers on 50 train-test instances ( $n=50$ ) with 500 genes selected by E-test, and measure the performance by the balanced accuracy score. Box plot shows the center line for the median, hinges for the interquartile range and whiskers for 1.5 times the interquartile range.

SciBet    scmap    Seurat v3

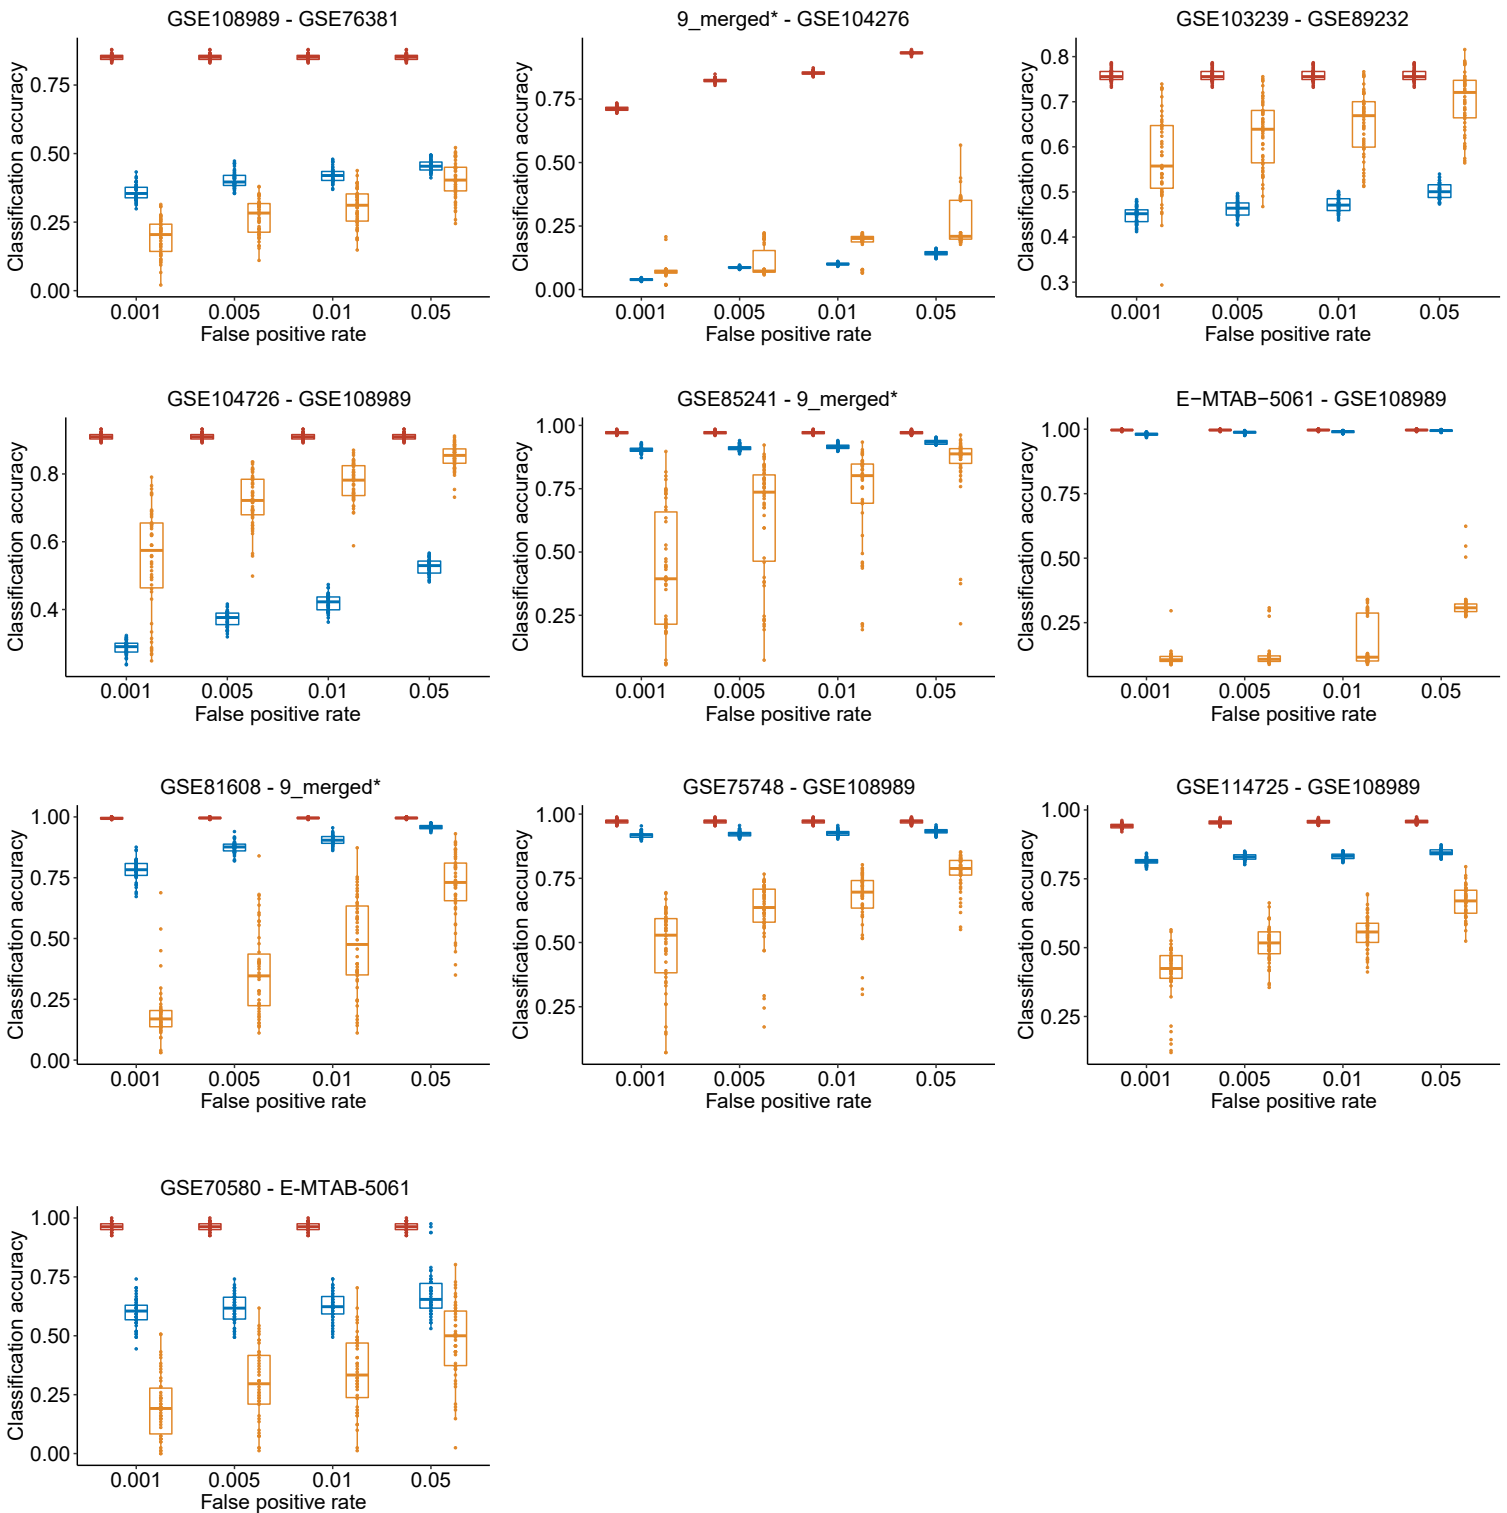

**Supplementary Figure 4.** Benchmark result of classifiers for each of the 10 FPR control pairs. For each sub-plot, benchmark different classifiers on 50 train-test instances ( $n=50$ ) with different FPRs, and measure the performance by the accuracy score. Box plot shows the center line for the median, hinges for the interquartile range and whiskers for 1.5 times the interquartile range.

## SUPPLEMENTARY TABLES

Supplementary Table 1: Datasets for the cross-validation benchmarks ----- 8

Supplementary Table 2: Datasets for the cross-platform benchmarks ----- 9

Supplementary Table 3: Datasets for building the mock human cell atlas ----- 10

Supplementary Table 4: Datasets for building the null dataset ----- 11

Supplementary Table 5: Datasets for the benchmark of the false-positive control ----- 12

Supplementary Table 6: Datasets of the immune datasets for the E-test case study ----- 13

**Supplementary Table 1. Datasets for the cross-validation benchmarks**

| <b>Num</b> | <b>Dataset</b>            | <b>Species</b> | <b>Cell types</b>              | <b>Experimental protocol</b> | <b>Number of cells</b> | <b>Number of cell types</b> |
|------------|---------------------------|----------------|--------------------------------|------------------------------|------------------------|-----------------------------|
| 1          | E-MTAB-5061 <sup>39</sup> | human          | Human pancreatic cells         | Smart-seq2                   | 2038                   | 6                           |
| 2          | GSE64016 <sup>6</sup>     | human          | hESC                           | SMARTer / Fluidigm C1        | 460                    | 4                           |
| 3          | GSE114725 <sup>31</sup>   | human          | Immune cells                   | InDrop                       | 1825                   | 12                          |
| 4          | GSE70580 <sup>10</sup>    | human          | CD127(+) innate lymphoid cells | Smart-seq2                   | 271                    | 4                           |
| 5          | GSE75140 <sup>11</sup>    | human          | fetal neocortex development    | SMARTer                      | 472                    | 4                           |
| 6          | GSE85241 <sup>2</sup>     | human          | Human pancreatic cells         | CEL-seq2                     | 2018                   | 6                           |
| 7          | GSE75748 <sup>13</sup>    | human          | hESC                           | SMARTer / Fluidigm C1        | 1810                   | 12                          |
| 8          | GSE81252 <sup>16</sup>    | human          | Human liver bud                | SMARTer                      | 318                    | 5                           |
| 9          | GSE81608 <sup>17</sup>    | human          | Human Islet Cells              | SMARTer/C1                   | 1501                   | 4                           |
| 10         | SRP073767 <sup>28</sup>   | human          | Immune cells                   | 10X                          | 17500                  | 7                           |
| 11         | GSE109774 <sup>1</sup>    | mouse          | Spleen                         | 10X                          | 9510                   | 4                           |
| 12         | GSE86618 <sup>20</sup>    | human          | Epithelial cells               | SMARTer                      | 540                    | 2                           |
| 13         | GSE109774 <sup>1</sup>    | mouse          | Heart                          | Smart-seq2                   | 4773                   | 10                          |
| 14         | GSE108989 <sup>33</sup>   | human          | CRC CD8 T cell                 | Smart-seq2                   | 3099                   | 7                           |



**Supplementary Table 2. Datasets for the cross-platform benchmarks**

| <b>Num</b> | <b>Training set</b>       | <b>Experimental protocol</b> | <b>Test set</b>           | <b>Experimental protocol</b> |
|------------|---------------------------|------------------------------|---------------------------|------------------------------|
| 1          | GSE84133 <sup>3</sup>     | inDrop                       | GSE85241 <sup>2</sup>     | CEL-Seq2                     |
| 2          | GSE84133 <sup>3</sup>     | inDrop                       | E-MTAB-5061 <sup>39</sup> | Smart-Seq2                   |
| 3          | GSE84133 <sup>3</sup>     | inDrop                       | GSE81608 <sup>17</sup>    | SMARTer                      |
| 4          | GSE85241 <sup>2</sup>     | CEL-Seq2                     | E-MTAB-5061 <sup>39</sup> | Smart-Seq2                   |
| 5          | GSE85241 <sup>2</sup>     | CEL-Seq2                     | GSE81608 <sup>17</sup>    | SMARTer                      |
| 6          | E-MTAB-5061 <sup>39</sup> | Smart-Seq2                   | GSE81608 <sup>17</sup>    | SMARTer                      |

**Supplementary Table 3. Datasets for building the mock human cell atlas**

| Num | Dataset                   | Tissue                                          | Experimental protocol       | Re-map with kallisto | Number of cells |
|-----|---------------------------|-------------------------------------------------|-----------------------------|----------------------|-----------------|
| 1   | GSE85241 <sup>2</sup>     | pancreatic cells                                | CEL-Seq2                    | No                   | 2018            |
| 2   | GSE84133 <sup>3</sup>     | pancreatic cells                                | inDrop                      | No                   | 8569            |
| 3   | GSE52529 <sup>4</sup>     | skeletal muscle myoblasts                       | SMARTer                     | Yes                  | 372             |
| 4   | GSE63473 <sup>5</sup>     | HEK                                             | drop-seq                    | No                   | 192             |
| 5   | GSE64016 <sup>6</sup>     | hESC                                            | SMARTer / Fluidigm C1       | Yes                  | 460             |
| 6   | GSE65364 <sup>7</sup>     | human hepatocellular carcinoma                  | scTrio-seq                  | Yes                  | 37              |
| 7   | GSE66053 <sup>8</sup>     | foreskin fibroblast cells / lung carcinoma      | Fluidigm C1                 | Yes                  | 96              |
| 8   | GSE67835 <sup>9</sup>     | brain                                           | Fluidigm C1                 | Yes                  | 89              |
| 9   | GSE70580 <sup>10</sup>    | CD127(+) innate lymphoid cells                  | Smart-Seq2                  | Yes                  | 271             |
| 10  | GSE75140 <sup>11</sup>    | fetal neocortex development                     | SMARTer                     | Yes                  | 472             |
| 11  | GSE75478 <sup>12</sup>    | hematopoietic stem and progenitors              | Smart-Seq2                  | Yes                  | 3854            |
| 12  | GSE75748 <sup>13</sup>    | hESC                                            | SMARTer / Fluidigm C1       | Yes                  | 1810            |
| 13  | GSE77288 <sup>14</sup>    | iPSCs                                           | SMARTer/Advantage 2 PCR kit | Yes                  | 2453            |
| 14  | GSE79920 <sup>15</sup>    | KD3 myoblasts, myotubes and mononucleated cells | SMARTer/C1                  | Yes                  | 246             |
| 15  | GSE81252 <sup>16</sup>    | human liver bud                                 | SMARTer                     | Yes                  | 318             |
| 16  | GSE81608 <sup>17</sup>    | Human Islet Cells                               | SMARTer/C1                  | Yes                  | 1501            |
| 17  | GSE83139 <sup>18</sup>    | human pancreatic endocrine cells                | SMART-seq                   | Yes                  | 1189            |
| 18  | GSE86207 <sup>19</sup>    | human and chimpanzee neural progenitors         | Nextera XT                  | Yes                  | 52              |
| 19  | GSE86618 <sup>20</sup>    | epithelial cells                                | SMARTer                     | Yes                  | 540             |
| 20  | GSE86894 <sup>21</sup>    | human embryonic stem cells                      | Smart-Seq2                  | Yes                  | 3420            |
| 21  | GSE87237 <sup>22</sup>    | Human naïve pluripotent stem cells              | TruSeq                      | Yes                  | 288             |
| 22  | GSE87849 <sup>23</sup>    | Macrophage                                      | SMARTer                     | Yes                  | 503             |
| 23  | GSE89232 <sup>24</sup>    | dendritic cells, cord blood and blood pre-cDCs  | Smart-Seq2                  | Yes                  | 1543            |
| 24  | GSE89236 <sup>25</sup>    | human nasal epithelial cells                    | 5' selective RNAseq         | No                   | 96              |
| 25  | GSE89237 <sup>25</sup>    | human nasal epithelial cells                    | 5' selective RNAseq         | No                   | 96              |
| 26  | GSE93593 <sup>27</sup>    | human Interneuron                               | Smart-Seq2                  | Yes                  | 1433            |
| 27  | SRP073767 <sup>28</sup>   | immune cells                                    | 10x genomics                | No                   | 17500           |
| 28  | GSE104276 <sup>29</sup>   | prefrontal cortex                               | Smart-Seq2                  | Yes                  | 2300            |
| 29  | GSE86146 <sup>30</sup>    | germ cells                                      | Smart-Seq2                  | No                   | 2167            |
| 30  | GSE114725 <sup>31</sup>   | immune cells                                    | inDrop                      | No                   | 1825            |
| 31  | GSE99254 <sup>32</sup>    | NSCLC T cell                                    | Smart-Seq2                  | No                   | 12346           |
| 32  | GSE108989 <sup>33</sup>   | CRC T cell                                      | Smart-Seq2                  | No                   | 3099            |
| 33  | GSE84799 <sup>36</sup>    | B cell                                          | Smart-Seq2                  | No                   | 130             |
| 34  | E-MTAB-5061 <sup>39</sup> | pancreatic cells                                | Smart-Seq2                  | No                   | 2038            |
| 35  | GSE77940 <sup>37</sup>    | B + macrophage + NK + T cell                    | Smart-Seq2                  | No                   | 4645            |
| 36  | GSE103239 <sup>40</sup>   | fetal digestive tract                           | STRT-seq                    | No                   | 5290            |
| 37  | GSE94820 <sup>41</sup>    | monocyte                                        | Smart-Seq2                  | No                   | 2422            |
| 38  | GSE103154 <sup>40</sup>   | adult digestive tract                           | STRT-seq                    | No                   | 1463            |
| 39  | GSE98638 <sup>43</sup>    | HCC T cell                                      | Smart-Seq2                  | No                   | 5063            |
| 40  | GSE81547 <sup>26</sup>    | pancreatic cells                                | SMARTer                     | No                   | 635             |
| 41  | GSE72056 <sup>37</sup>    | B + macrophage + NK + T cell                    | Smart-Seq2                  | No                   | 4645            |
| 42  | GSE75688 <sup>35</sup>    | Immune cells                                    | SMARTer                     | No                   | 515             |

**Supplementary Table 4. Datasets for building the null dataset**

| Num | Dataset                 | Species | Tissue                                          | Experimental protocol | Re-map with kallisto |
|-----|-------------------------|---------|-------------------------------------------------|-----------------------|----------------------|
| 1   | GSE85241 <sup>2</sup>   | human   | pancreatic cells                                | CEL-Seq2              | No                   |
| 2   | GSE84133 <sup>3</sup>   | human   | pancreatic cells                                | inDrop                | No                   |
| 3   | GSE52529 <sup>4</sup>   | human   | skeletal muscle myoblasts                       | SMARTer               | Yes                  |
| 4   | GSE63473 <sup>5</sup>   | human   | HEK                                             | drop-seq              | No                   |
| 5   | GSE64016 <sup>6</sup>   | human   | hESC                                            | SMARTer / Fluidigm C1 | Yes                  |
| 6   | GSE65364 <sup>7</sup>   | human   | human hepatocellular carcinoma                  | scTrio-seq            | Yes                  |
| 7   | GSE66053 <sup>8</sup>   | human   | foreskin fibroblast cells / lung carcinoma      | Fluidigm C1           | Yes                  |
| 8   | GSE67835 <sup>9</sup>   | human   | brain                                           | Fluidigm C1           | Yes                  |
| 9   | GSE70580 <sup>10</sup>  | human   | CD127(+) innate lymphoid cells                  | Smart-Seq2            | Yes                  |
| 10  | GSE75140 <sup>11</sup>  | human   | fetal neocortex development                     | SMARTer               | Yes                  |
| 11  | GSE75478 <sup>12</sup>  | human   | hematopoietic stem and progenitors              | Smart-Seq2            | Yes                  |
| 12  | GSE75748 <sup>13</sup>  | human   | hESC                                            | SMARTer / Fluidigm C1 | Yes                  |
| 13  | GSE77288 <sup>14</sup>  | human   | iPSCs                                           | SMARTer               | Yes                  |
| 14  | GSE79920 <sup>15</sup>  | human   | KD3 myoblasts, myotubes and mononucleated cells | SMARTer/C1            | Yes                  |
| 15  | GSE81252 <sup>16</sup>  | human   | human liver bud                                 | SMARTer               | Yes                  |
| 16  | GSE81608 <sup>17</sup>  | human   | Human Islet Cells                               | SMARTer/C1            | Yes                  |
| 17  | GSE83139 <sup>18</sup>  | human   | human pancreatic endocrine cells                | SMART-seq             | Yes                  |
| 18  | GSE86207 <sup>19</sup>  | human   | human and chimpanzee neural progenitors         | Nextera XT            | Yes                  |
| 19  | GSE86618 <sup>20</sup>  | human   | epithelial cells                                | SMARTer               | Yes                  |
| 20  | GSE86894 <sup>21</sup>  | human   | human embryonic stem cells                      | Smart-Seq2            | Yes                  |
| 21  | GSE87237 <sup>22</sup>  | human   | Human naïve pluripotent stem cells              | TruSeq                | Yes                  |
| 22  | GSE87849 <sup>23</sup>  | human   | Macrophage                                      | SMARTer               | Yes                  |
| 23  | GSE89232 <sup>24</sup>  | human   | dendritic cells, cord blood and blood pre-cDCs  | Smart-Seq2            | Yes                  |
| 24  | GSE89236 <sup>25</sup>  | human   | human nasal epithelial cells                    | 5' selective RNAseq   | No                   |
| 25  | GSE89237 <sup>25</sup>  | human   | human nasal epithelial cells                    | 5' selective RNAseq   | No                   |
| 26  | GSE93593 <sup>27</sup>  | human   | human Interneuron                               | Smart-Seq2            | Yes                  |
| 27  | SRP073767 <sup>28</sup> | human   | immune cells                                    | 10x genomics          | No                   |
| 28  | GSE104276 <sup>29</sup> | human   | prefrontal cortex                               | Smart-Seq2            | Yes                  |
| 29  | GSE86146 <sup>30</sup>  | human   | germ cells                                      | Smart-Seq2            | No                   |
| 30  | GSE114725 <sup>31</sup> | human   | Breast cancer T cell                            | Smart-Seq2            | No                   |
| 31  | GSE99254 <sup>32</sup>  | human   | NSCLC T cell                                    | Smart-Seq2            | No                   |
| 32  | GSE108989 <sup>33</sup> | human   | CRC T cell                                      | Smart-Seq2            | No                   |
| 33  | GSE75688 <sup>35</sup>  | human   | Immune cells                                    | SMARTer               | No                   |

**Supplementary Table 5. Datasets for the benchmark of the false-positive control**

| Num | Dataset                   | Cell types                         | Negative                  | Cell types        |
|-----|---------------------------|------------------------------------|---------------------------|-------------------|
| 1   | GSE104276 <sup>29</sup>   | prefrontal cortex                  | GSE108989 <sup>33</sup>   | CD8 T cell        |
| 2   | GSE108989 <sup>33</sup>   | CD8 T cells                        | GSE76381 <sup>42</sup>    | brain             |
| 3   | E-MTAB-5061 <sup>39</sup> | pancreatic cell                    | GSE108989 <sup>33</sup>   | CD8 T cell        |
| 4   | GSE70580 <sup>10</sup>    | ILC                                | E-MTAB-5061 <sup>39</sup> | pancreatic cells  |
| 5   | GSE75748 <sup>13</sup>    | hematopoietic stem and progenitors | GSE108989 <sup>33</sup>   | CD4 T cell        |
| 6   | GSE81608 <sup>17</sup>    | pancreatic cells                   | 9_merged*                 | immune cells      |
| 7   | GSE85241 <sup>2</sup>     | pancreatic cells                   | 9_merged*                 | immune cells      |
| 8   | GSE86146 <sup>30</sup>    | germ cells                         | GSE108989 <sup>33</sup>   | CD4 T cell        |
| 9   | GSE103239 <sup>40</sup>   | fetal digestive tract              | GSE89232 <sup>24</sup>    | DC                |
| 10  | 9_merged*                 | immune cells                       | GSE104276 <sup>29</sup>   | prefrontal cortex |

| Num of 9_merged: | Dataset                 | Cell types                   |
|------------------|-------------------------|------------------------------|
| 1                | GSE99254 <sup>32</sup>  | T cell                       |
| 2                | GSE108989 <sup>33</sup> | T cell                       |
| 3                | GSE84789 <sup>36</sup>  | B cell                       |
| 4                | GSE77940 <sup>37</sup>  | B + macrophage + NK + T cell |
| 5                | GSE89232 <sup>24</sup>  | DC                           |
| 6                | GSE94820 <sup>41</sup>  | DC                           |
| 7                | GSE70580 <sup>10</sup>  | ILC + NK                     |
| 8                | GSE94820 <sup>41</sup>  | monocyte                     |
| 9                | GSE87849 <sup>23</sup>  | macrophage                   |

**Supplementary Table 6. Datasets of the immune datasets for the E-test case study**

| <b>Num</b> | <b>Dataset</b>          | <b>Species</b> | <b>Cell types</b>            | <b>Experimental protocol</b> |
|------------|-------------------------|----------------|------------------------------|------------------------------|
| 1          | GSE99254 <sup>32</sup>  | human          | T cell                       | Smart-Seq2                   |
| 2          | GSE108989 <sup>33</sup> | human          | T cell                       | Smart-Seq2                   |
| 3          | GSE84799 <sup>36</sup>  | human          | B cell                       | Smart-Seq2                   |
| 4          | GSE77940 <sup>37</sup>  | human          | B + macrophage + NK + T cell | TruSeq                       |
| 5          | GSE89232 <sup>24</sup>  | human          | DC                           | Smart-Seq2                   |
| 6          | GSE70580 <sup>10</sup>  | human          | ILC + NK                     | Smart-Seq2                   |
| 7          | GSE87849 <sup>23</sup>  | human          | macrophage                   | SMARTer                      |

# SUPPLEMENTARY NOTES

## Note 1: Discussion on the metrics for measuring the classification performance

We collected datasets from the source of the publications with the original cell type annotation. Because the cells were annotated by the publications with the unsupervised workflow, which usually consists of clustering, differential expression and cell type identification based on marker gene of each cluster, cell numbers of different cell types rarely have equal proportions. Such unequal proportions reflect true proportions of cells within each dataset, and thus have different contributions to the global assessment of accuracy. So, we used the *accuracy score*<sup>44</sup> as the default metric, which equals to  $\frac{\text{total number of correct classification}}{\text{number of all cells in the test set}}$  and also equals to the micro-average recall score of each cell type (i.e., calculating the accuracy of classification for each cell type, and then averaging them with the weight in proportion to the number of each cell type). Here is the derivation:

If we have a dataset with  $n$  cell types and for each cell type  $i$ , we have assigned  $a_i$  and  $b_i$  cells with the correct and wrong cell type in the test set, respectively:

*accuracy score* =  $\frac{\text{total number of correct classification}}{\text{number of all cells}} = \frac{\sum a_i}{\sum a_i + \sum b_i}$ . We can also

calculate the recall score for each cell type:

$\text{recall}_i = \frac{\text{number of correct classification for cell type } i}{\text{total number of cell type } i \text{ in the test set}} = \frac{a_i}{a_i + b_i}$ , and

$\text{weight}_i = \frac{\text{number of cell type } i}{\text{number of all cells}} = \frac{a_i + b_i}{\sum a_i + \sum b_i}$ . So, the micro-average recall =  $\sum (\text{acc}_i * \text{weight}_i)$

$\text{weight}_i = \sum \left( \frac{a_i}{a_i + b_i} * \frac{a_i + b_i}{\sum a_i + \sum b_i} \right) = \frac{\sum a_i}{\sum a_i + \sum b_i} = \text{accuracy score}$ .

We also applied the balanced accuracy score<sup>44</sup> (the macro-average recall score) to measure the overall performance, which equals to  $\frac{1}{n} \sum \text{recall}_i$ , to account for the rare cell types, where each cell type in the test set has equal contribution.

## Note 2: Detailed derivation and discussion for E-test

### Note 2.1: Calculation of entropy in a given cell type

We applied the strategy proposed by Splatter<sup>45</sup> and Saver<sup>46</sup> to model the observed expression  $Z_{ic}$  for gene  $i$  (ranges from 1 to  $m$ ) in cell  $c$  (ranges from 1 to  $C$ ) with the identical cell type as following:

$$Z_{ic} \sim \text{Poisson}(\lambda_i * s_c), \lambda_i \sim \text{Gamma}(\alpha_i, \beta_i)$$

, where  $\lambda_i$  represents the Gamma-distributed true expression of gene  $i$  in cell  $c$ , and  $s_c$  represents the size-factor (can be calculated by  $\sum_c Z_{ic}$ ) of cell  $c$  accounting for the sequencing depth. Then we approximately estimate the Poisson rate  $\lambda_i * s_c$  directly by  $Z_{ic}$  using the moment estimation. Thus, for each cell we will obtain  $\lambda_{ic} = \frac{Z_{ic}}{s_c}$  as  $C$  observations for  $\lambda_i$ , which is in accordance with the size-factor normalized expression described in part Data collection and processing of section Methods.

We applied the differential entropy from information theory to measure the dispersion degree of the distribution. The Shannon entropy  $S_i$  of the Gamma-distributed true expression  $\lambda_i$  can be calculated by the equation<sup>47</sup>:

$$S_i = \alpha_i - \ln \beta_i + \ln \Gamma(\alpha_i) + (1 - \alpha_i) \psi(\alpha_i) \quad \text{-----(1)}$$

, where  $\psi$  represent the digamma function. Then we replace  $\beta_i$  with its maximum likelihood estimation as  $\hat{\beta}_i = \frac{\alpha_i}{E(\lambda_i)}$ , where  $E(\lambda_i) = \frac{1}{C} \sum_c \lambda_{ic}$  served as the unbiased estimation of  $\lambda_i$ . Thus, formula (1) can be further derived into:

$$S_i = \alpha_i - \ln \alpha_i + \ln E(\lambda_i) - \ln \Gamma(\alpha_i) + (1 - \alpha_i) \psi(\alpha_i) \quad \text{-----(2)}$$

We denote  $h_i = \alpha_i - \ln \alpha_i + \ln \Gamma(\alpha_i) + (1 - \alpha_i)\psi(\alpha_i)$  -----(3)

as the function of the gene-specific parameter  $\alpha_i$ , and denote the mean normalized expression over C cells as  $X_i = E(\lambda_i) = \frac{1}{C} \sum_c \lambda_{ic}$ . Thus,

Supplementary Equation (2) can be derived into

$$S_i = \ln E(\lambda_i) + h_i = \ln X_i + h_i \quad \text{-----(4)}$$

## Note 2.2: Calculation of entropy of different cell types

In Supplementary Note 2.1, we obtained the Supplementary Equation (4) for the calculation of entropy of gene i in a given cell type. For cell c (ranges from 1 to C<sub>j</sub>) belonging to cell type j, we define  $X_{ij} = \frac{1}{C_j} \sum_{c \in j} \lambda_{ic}$  as the mean normalized gene expression over cells belonging to cell type j, and calculate the entropy  $S_{ij}$  of gene i in cell type j as:

$$S_{ij} = \ln X_{ij} + h_{ij} \quad \text{----- (5)}$$

, where  $h_{ij} = \alpha_{ij} - \ln \alpha_{ij} + \ln \Gamma(\alpha_{ij}) + (1 - \alpha_{ij})\psi(\alpha_{ij})$  -----(6)

We then assume that  $h_{ij} = h_i$ , that is, h is gene-specific but not cell type-specific. Then we obtained the Equation (1) in Main Text:  $S_{ij} = \ln X_{ij} + h_i$ . The assumption of  $h_{ij} = h_i$  is equivalent to another assumption proposed by Lun et al.<sup>48</sup>, where they modeled the differential expression among multiple groups with fixed fold changes. Here is the derivation: We denote  $\lambda_{i,c \in j}$  as the observations of the Gamma-distributed true expression  $\lambda_{ij} \sim \text{Gamma}(\alpha_{ij}, \beta_{ij})$  of gene i in cell type j. For gene i, if we multiply  $\lambda_{ij}$  with a fixed constant  $F_{i,j \rightarrow j'}$  as the fold change of gene i, from cell type j to j', as  $\lambda_{ij'} = F_{i,j \rightarrow j'} * \lambda_{ij}$ . Thus,  $\lambda_{ij'}$  will follow  $\text{Gamma}(\alpha_{ij}, \beta_{ij}/F_{i,j \rightarrow j'})$ , according to the scaling property of the Gamma distribution (See the following lemma in Note 2.3). Here we note that the Gamma-distributed  $\lambda_{ij'}$  and  $\lambda_{ij}$  share the identical  $\alpha_{ij}$ . Thus, for all cell types, the shape parameter  $\alpha_{ij}$  is not cell type-specific, as  $\alpha_{ij} = \alpha_i$ . According



to Supplementary Equation (6),  $h$  will also be the gene-specific but not cell type-specific variable in accordance with  $\alpha$ .

### Note 2.3: The scaling property of the Gamma distribution

**Definition:** if  $X \sim \text{Gamma}(\alpha, \beta)$ , then  $Y = kX \sim \text{Gamma}(\alpha, \beta/k)$  for any  $k > 0$ .

**Proof:** The probability density function for  $X$  is defined as:

$$f_X(x) = \frac{\beta^\alpha}{\Gamma(\alpha)} x^{\alpha-1} e^{-\beta x}, \quad \text{for all } x > 0$$

We then let  $k$  as a positive constant, and thus the Jacobian of the transformation

will be  $\frac{dX}{dY} = \frac{1}{k}$ .

So,  $f_Y(y) = \frac{dX}{dY} * f_X\left(\frac{y}{k}\right) = \frac{1}{k} * \frac{\beta^\alpha}{\Gamma(\alpha)} * \left(\frac{y}{k}\right)^{\alpha-1} * e^{-\frac{\beta y}{k}} = \frac{\left(\frac{\beta}{k}\right)^\alpha}{\Gamma(\alpha)} * y^{\alpha-1} e^{-\frac{\beta}{k} * y}$ , for all  $y > 0$ .

Now  $f_Y(y)$  is exactly the probability density function of  $\text{Gamma}(\alpha, \beta/k)$ .

### Note 2.4: Permutation test for obtaining the significance of $\Delta S$

$\Delta S_i$ , the total entropy difference of gene  $i$  is defined as Equation (3) in the main text, as  $\Delta S_i = \sum_{j=1}^n (S_{i0} - S_{ij}) = \sum_{j=1}^n (\ln X_{i0} + h_i - \ln X_{ij} - h_i)$ , where the significance of  $\Delta S$  can be approximated by the permutation test (randomly permute the cell group labels, calculate  $\Delta S$  for each permutation and find the percentile of the actual  $\Delta S$ ), which may take long time. Here we show a parametric method to accelerate this process by replacing the permutating step, as following:

Under the null hypothesis that all cells from the pre-defined groups are randomly sampled from the the same cell population, each cell type  $j$  will have the identical mean size-factor normalized expression  $X_{ij}$ , which follows a normal distribution  $N(\mu_i, \sigma_i)$  according to the central limit theorem. Here we can denote

the unbiased estimation for the parameters as  $\hat{\mu}_i = \frac{1}{n} * \sum_{j=1}^n X_{ij}$  and  $\hat{\sigma}_i = \frac{1}{n-1} *$

$\sum_{j=1}^n (X_{ij} - \hat{\mu}_i)^2$ . Notably,  $\hat{\mu}_i$  is exact the  $X_{i0}$ , the mean size-factor normalized expression of the null group 0, as we defined in the main text. For each round

of permutation, we can generate  $n$   $X_i$  observations from  $N(\mu_i, \sigma_i)$  with the constraint that  $\hat{\mu}_i = \frac{1}{n} * \sum_{j=1}^n X_{ij}$  (this process equals to generating  $n-1$   $X_i$  observations and calculate another by the  $n-1$  observations and  $\hat{\mu}_i$ ). Then, we can calculate  $\Delta S$  according to formula (\*\*\*)).

### **Note 3: Discussion on whether to use the cell type prior probability in SciBet model training**

The proportion of each type of cell in the data measured by a single cell sequencing does not necessarily and correctly reflect the prior probability of appearance. For example, if a piece of tissue is sequenced without any sorting, then the proportion of each cell type in the results of single-cell sequencing can reflect the prior probability. However, if certain artificial filtering (such as Fluorescence-activated cell sorting to select cells highly expressing certain surface protein) is performed, or the dataset is integrated from different batches or studies, then the final cell type ratio at this time cannot correctly reflect the prior probability of the appearance of such cell types. This latter situation is more common and considered to be more appropriate for maximum likelihood estimation (i.e., the prior probabilities of each class are considered equal in Bayesian decision making), which is used as the default option.

If users choose to consider the prior probabilities of different cell types, they can replace the strategy for making decision (formular (\*\*\*) in part Supervised cell type prediction by SciBet, section METHODS) with the following strategy of Bayes Decision Rule  $\hat{j} = \operatorname{argmax}_j (P(y|j) * P(j)) = \operatorname{argmax}_j (\prod_i (p_{ij}^{y_i}) * P(j))$ , to make decisions. And in most cases, users can estimate the prior probability according to the proportion of cell types in the training set.

# SUPPLEMENTARY REFERENCES

- 1 Tabula Muris, C. et al. Single-cell transcriptomics of 20 mouse organs creates a Tabula Muris. *Nature* 562, 367–372, doi:10.1038/s41586-018-0590-4 (2018).
- 2 Muraro, M. J. et al. A Single-Cell Transcriptome Atlas of the Human Pancreas. *Cell Syst.* 3, 385–394.e3 (2016).
- 3 Baron, M. et al. A Single-Cell Transcriptomic Map of the Human and Mouse Pancreas Reveals Inter- and Intra-cell Population Structure. *Cell Syst.* 3, 346–360.e4 (2016).
- 4 Trapnell, C. et al. The dynamics and regulators of cell fate decisions are revealed by pseudotemporal ordering of single cells. *Nat. Biotechnol.* 32, 381 (2014).
- 5 Macosko, E. Z. et al. Highly Parallel Genome-wide Expression Profiling of Individual Cells Using Nanoliter Droplets. *Cell* 161, 1202–1214 (2015).
- 6 Leng, N. et al. Oscope identifies oscillatory genes in unsynchronized single-cell RNA-seq experiments. *Nat. Methods* 12, 947 (2015).
- 7 Hou, Y. et al. Single-cell triple omics sequencing reveals genetic, epigenetic, and transcriptomic heterogeneity in hepatocellular carcinomas. *Cell Res.* 26, 304 (2016).
- 8 Padovan-Merhar, O. et al. Single Mammalian Cells Compensate for Differences in Cellular Volume and DNA Copy Number through Independent Global Transcriptional Mechanisms. *Mol. Cell* 58, 339–352 (2015).
- 9 Darmanis, S. et al. A survey of human brain transcriptome diversity at the single cell level. *Proc. Natl. Acad. Sci.* 112, 7285 (2015).
- 10 Björklund, Å. K. et al. The heterogeneity of human CD127+ innate lymphoid cells revealed by single-cell RNA sequencing. *Nat. Immunol.* 17, 451 (2016).
- 11 Camp, J. G. et al. Human cerebral organoids recapitulate gene expression programs of fetal neocortex development. *Proc. Natl. Acad. Sci.* 112, 15672 (2015).
- 12 Velten, L. et al. Human haematopoietic stem cell lineage commitment is a continuous process. *Nat. Cell Biol.* 19, 271 (2017).
- 13 Chu, L.-F. et al. Single-cell RNA-seq reveals novel regulators of human embryonic stem cell

- differentiation to definitive endoderm. *Genome Biol.* 17, 173 (2016).
- 14 Tung, P.-Y. et al. Batch effects and the effective design of single-cell gene expression studies. *Sci. Rep.* 7, 39921 (2017).
  - 15 Zeng, W. et al. Single-nucleus RNA-seq of differentiating human myoblasts reveals the extent of fate heterogeneity. *Nucleic Acids Res.* 44, e158–e158 (2016).
  - 16 Camp, J. G. et al. Multilineage communication regulates human liver bud development from pluripotency. *Nature* 546, 533 (2017).
  - 17 Xin, Y. et al. RNA Sequencing of Single Human Islet Cells Reveals Type 2 Diabetes Genes. *Cell Metab.* 24, 608–615 (2016).
  - 18 Wang, Y. J. et al. Single-Cell Transcriptomics of the Human Endocrine Pancreas. *Diabetes* 65, 3028 (2016).
  - 19 Mora-Bermúdez, F. et al. Differences and similarities between human and chimpanzee neural progenitors during cerebral cortex development. *eLife* 5, e18683 (2016).
  - 20 Xu, Y. et al. Single-cell RNA sequencing identifies diverse roles of epithelial cells in idiopathic pulmonary fibrosis. *JCI Insight* 1, (2017).
  - 21 Yao, Z. et al. A Single-Cell Roadmap of Lineage Bifurcation in Human ESC Models of Embryonic Brain Development. *Cell Stem Cell* 20, 120–134 (2017).
  - 22 Sahakyan, A. et al. Human Naive Pluripotent Stem Cells Model X Chromosome Dampening and X Inactivation. *Cell Stem Cell* 20, 87–101 (2017).
  - 23 Wills, Q. F. et al. The nature and nurture of cell heterogeneity: accounting for macrophage gene-environment interactions with single-cell RNA-Seq. *BMC Genomics* 18, 53–53 (2017).
  - 24 Breton, G. et al. Human dendritic cells (DCs) are derived from distinct circulating precursors that are precommitted to become CD1c<sup>+</sup> or CD141<sup>+</sup> DCs. *J. Exp. Med.* 213, 2861–2870 (2016).
  - 25 Arguel, M.-J. et al. A cost effective 5' selective single cell transcriptome profiling approach with improved UMI design. *Nucleic Acids Res.* 45, e48–e48 (2017).
  - 26 Enge, M. et al. Single-Cell Analysis of Human Pancreas Reveals Transcriptional Signatures of Aging and Somatic Mutation Patterns. *Cell* 171, 321–330 e314, doi:10.1016/j.cell.2017.09.004 (2017).
  - 27 Close, J. L. et al. Single-Cell Profiling of an In Vitro Model of Human Interneuron Development Reveals Temporal Dynamics of Cell Type Production and Maturation. *Neuron* 93, 1035–1048.e5

(2017).

28 Zheng, G. X. Y. et al. Massively parallel digital transcriptional profiling of single cells. *Nat. Commun.* 8, 14049 (2017).

29 Zhong, S. et al. A single-cell RNA-seq survey of the developmental landscape of the human prefrontal cortex. *Nature* 555, 524–528 (2018).

30 Li, L. et al. Single-Cell RNA-Seq Analysis Maps Development of Human Germline Cells and Gonadal Niche Interactions. *Cell Stem Cell* 20, 858–873.e4 (2017).

31 Azizi, E. et al. Single-Cell Map of Diverse Immune Phenotypes in the Breast Tumor Microenvironment. *Cell* 174, 1293–1308.e36 (2018).

32 Guo, X. et al. Global characterization of T cells in non-small-cell lung cancer by single-cell sequencing. *Nat. Med.* 24, 978–985 (2018).

33 Zhang, L. et al. Lineage tracking reveals dynamic relationships of T cells in colorectal cancer. *Nature* 564, 268–272 (2018).

34 Yan, L. et al. Single-cell RNA-Seq profiling of human preimplantation embryos and embryonic stem cells. *Nat. Struct. Amp Mol. Biol.* 20, 1131 (2013).

35 Chung, W. et al. Single-cell RNA-seq enables comprehensive tumour and immune cell profiling in primary breast cancer. *Nat Commun* 8, 15081, doi:10.1038/ncomms15081 (2017).

36 Lizotte, P. H. et al. Multiparametric profiling of non-small-cell lung cancers reveals distinct immunophenotypes. *JCI Insight* 1, (2016).

37 Tirosh, I. et al. Dissecting the multicellular ecosystem of metastatic melanoma by single-cell RNA-seq. *Science* 352, 189 (2016).

38 Ohta, R. et al. Laminin-guided highly efficient endothelial commitment from human pluripotent stem cells. *Sci. Rep.* 6, 35680 (2016).

39 Segerstolpe, Å. et al. Single-Cell Transcriptome Profiling of Human Pancreatic Islets in Health and Type 2 Diabetes. *Cell Metab.* 24, 593–607 (2016).

40 Gao, S. et al. Tracing the temporal-spatial transcriptome landscapes of the human fetal digestive tract using single-cell RNA-sequencing. *Nat. Cell Biol.* 20, 721–734 (2018).

41 See, P., Lum, J., Chen, J. & Ginhoux, F. A Single-Cell Sequencing Guide for Immunologists. *Front. Immunol.* 9, 2425 (2018).

42 La Manno, G. et al. Molecular Diversity of Midbrain Development in Mouse, Human, and Stem

Cells. *Cell* 167, 566-580.e19 (2016).

43 Zheng, C. et al. Landscape of Infiltrating T Cells in Liver Cancer Revealed by Single-Cell Sequencing. *Cell* 169, 1342-1356 e1316, doi:10.1016/j.cell.2017.05.035 (2017).

44 Pedregosa, F. et al. Scikit-learn: Machine Learning in Python. *J Mach Learn Res* **12**, 2825-2830 (2011).

45 Zappia, L., Phipson, B. & Oshlack, A. Splatter: simulation of single-cell RNA sequencing data. *Genome Biol* 18, 174, doi:10.1186/s13059-017-1305-0 (2017).

46 Huang, M. et al. SAVER: gene expression recovery for single-cell RNA sequencing. *Nat Methods* 15, 539-542, doi:10.1038/s41592-018-0033-z (2018).

47 Awad, A. The Shannon entropy of generalized gamma and of related distribution. (1991).

48 Lun, A. T., Bach, K. & Marioni, J. C. Pooling across cells to normalize single-cell RNA sequencing data with many zero counts. *Genome Biol* 17, 75, doi:10.1186/s13059-016-0947-7 (2016).
